# Supplementary material for: Self-Assembly-Directed Exciton Diffusion in Solution-Processable Metalloporphyrin Thin Films
Source: MDPI journal article supplement (doi:10.3390/molecules27010035), 2021-12-22

## Supporting Information

### Self-Assembly-Directed Exciton Diffusion in Solution-Processable Metalloporphyrin Thin Films

Abhishek Shibu, Camilla Middleton, Carly O. Kwiatkowski, Meesha Kaushal, Jonathan H. Gillen and Michael G. Walter\*

[\*] Prof. M. G. Walter, Corresponding Author

Department of Chemistry

University of North Carolina at Charlotte

Charlotte, NC 28223 (USA)

**Figure S1.** Time-resolved fluorescence spectra and first order fitting of a) ZnTCB<sub>4</sub>PP, b) ZnTCH<sub>4</sub>PP, c) ZnTCEH<sub>4</sub>PP and d) ZnTCO<sub>4</sub>PP.

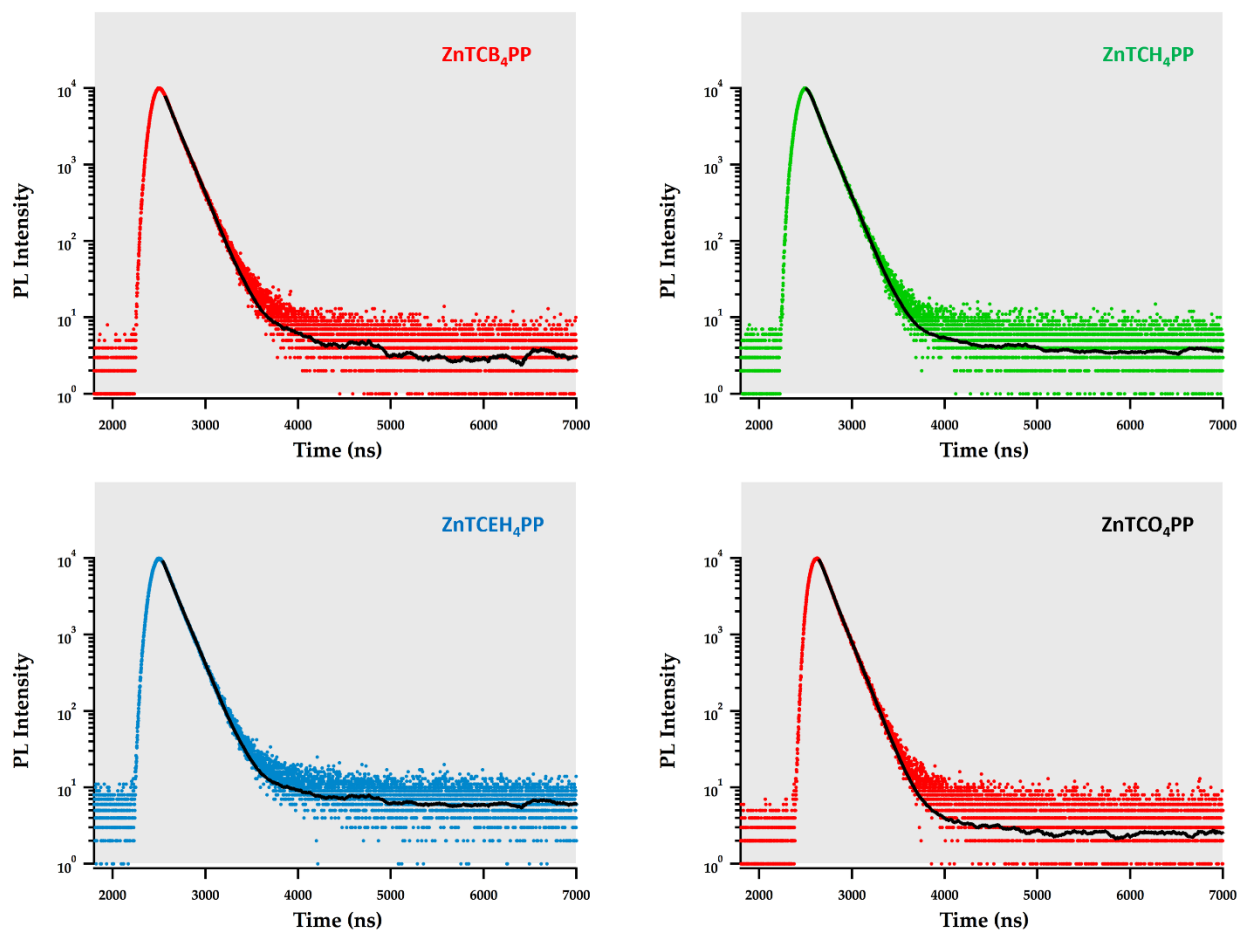

| Metalloporphyrin       | $\tau_{S1}$ (ns) |
|------------------------|------------------|
| ZnTCB <sub>4</sub> PP  | 1.89             |
| ZnTCH <sub>4</sub> PP  | 1.89             |
| ZnTCEH <sub>4</sub> PP | 1.89             |
| ZnTCO <sub>4</sub> PP  | 1.85             |

**Figure S2:** UV-Vis absorption spectra of spin-cast metalloporphyrins thin films of (a) ZnTCB<sub>4</sub>PP, (b) ZnTCH<sub>4</sub>PP, (c) ZnTCEH<sub>4</sub>PP and (d) ZnTCO<sub>4</sub>PP. Each plot includes spectra of pristine films (-), films doped with  $v_{\text{frac}}$  0.06% (-) and films doped with  $v_{\text{frac}}$  0.2% (-)

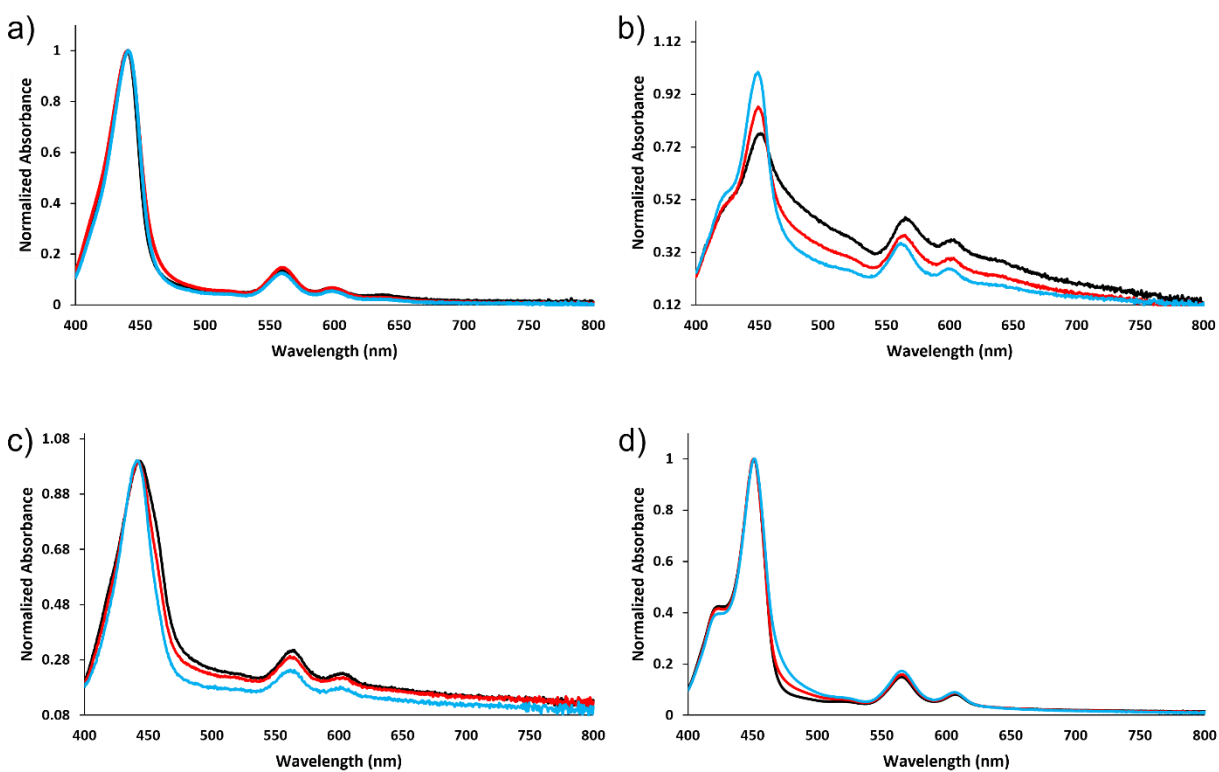

**Table S1:** XRD Diffraction Data for ZnTCB<sub>4</sub>PP, ZnTCH<sub>4</sub>PP, ZnTCEH<sub>4</sub>PP and ZnTCO<sub>4</sub>PP (Cu K $\alpha$  radiation of  $\lambda = 1.541 \text{ \AA}$ ).

| Material                    | Peak (2 $\theta$ ) | d-spacing ( $\text{\AA}$ ) | Intensity | Rel Intensity |
|-----------------------------|--------------------|----------------------------|-----------|---------------|
| <b>ZnTCB<sub>4</sub>PP</b>  | 5.87               | 15.05                      | 77        | 0.31          |
|                             | 13.95              | 6.34                       | 122       | 0.49          |
|                             | 16.81              | 5.27                       | 250       | 1.00          |
|                             | 18.73              | 4.74                       | 62        | 0.25          |
|                             | 25.45              | 3.50                       | 57        | 0.23          |
|                             |                    |                            |           |               |
| <b>ZnTCH<sub>4</sub>PP</b>  | 5.51               | 16.03                      | 155       | 0.58          |
|                             | 14.09              | 6.28                       | 114       | 0.43          |
|                             | 16.91              | 5.24                       | 265       | 1.00          |
|                             | 18.43              | 4.81                       | 64        | 0.24          |
|                             | 25.35              | 3.51                       | 57        | 0.22          |
|                             |                    |                            |           |               |
| <b>ZnTCO<sub>4</sub>PP</b>  | 4.61               | 19.16                      | 365       | 2.97          |
|                             | 9.21               | 9.60                       | 30        | 0.24          |
|                             | 13.87              | 6.38                       | 64        | 0.52          |
|                             | 16.87              | 5.25                       | 123       | 1.00          |
|                             | 18.45              | 4.81                       | 52        | 0.42          |
|                             | 25.33              | 3.51                       | 49        | 0.40          |
|                             |                    |                            |           |               |
| <b>ZnTCEH<sub>4</sub>PP</b> | 14.07              | 6.29                       | 188       | 0.40          |
|                             | 16.85              | 5.26                       | 474       | 1.00          |
|                             | 18.47              | 4.80                       | 87        | 0.18          |
|                             | 25.57              | 3.48                       | 77        | 0.16          |

**Figure S3:**  $^1\text{H}$ -NMR of  $\text{ZnTCB}_4\text{PP}$

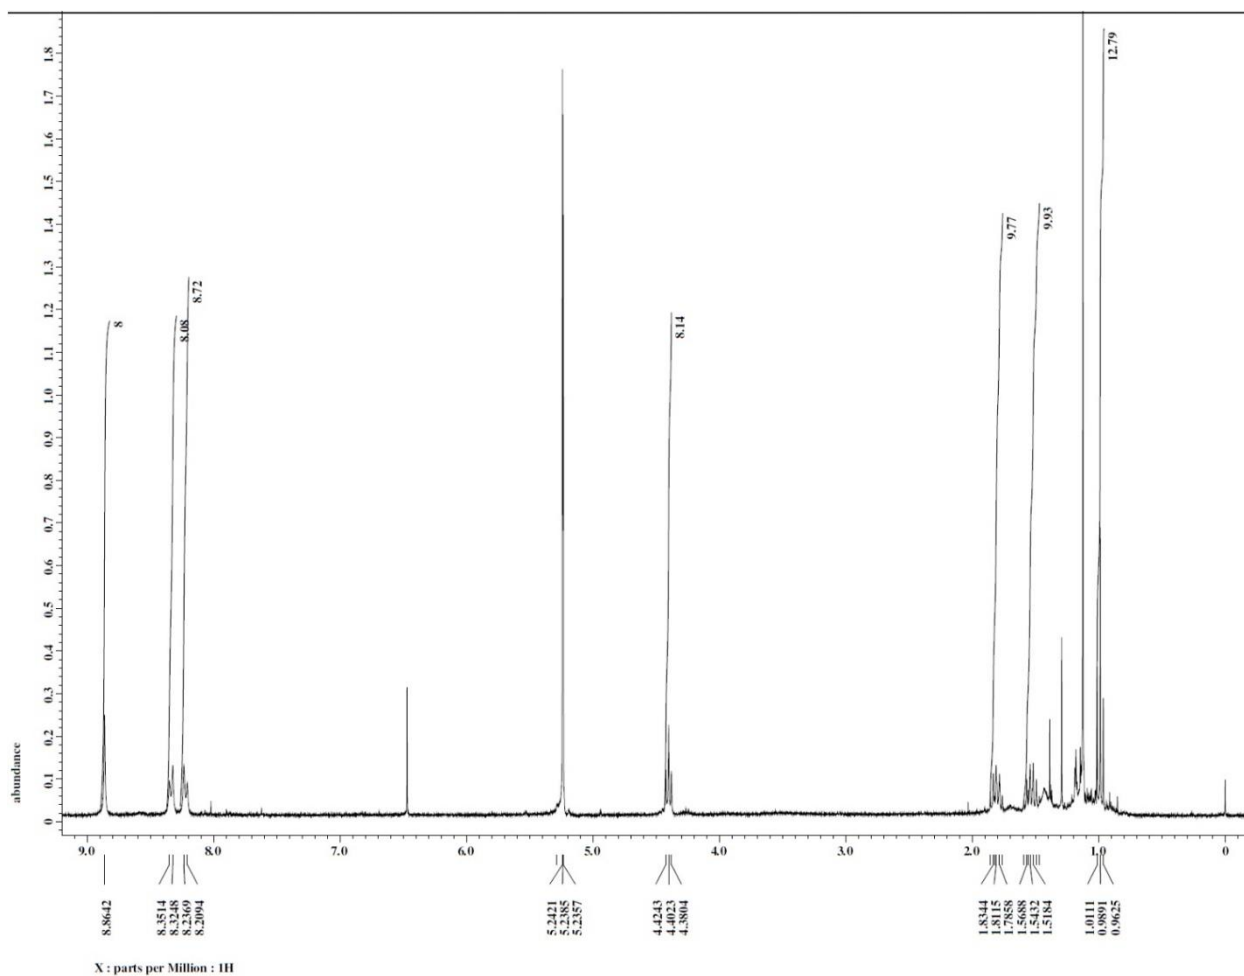

**Figure S4:** MALDI-TOF Mass Spectra of ZnTCB<sub>4</sub>PP

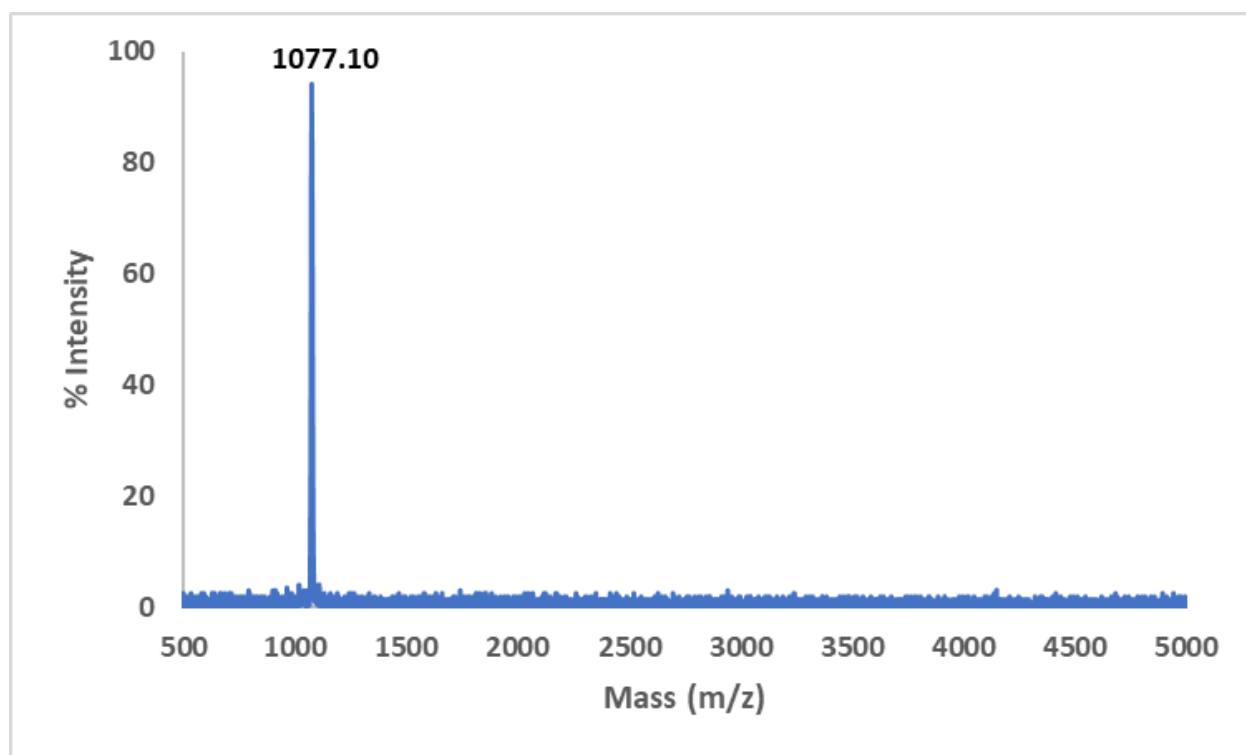

Figure S5:  $^1\text{H}$ -NMR of  $\text{ZnTCH}_4\text{PP}$

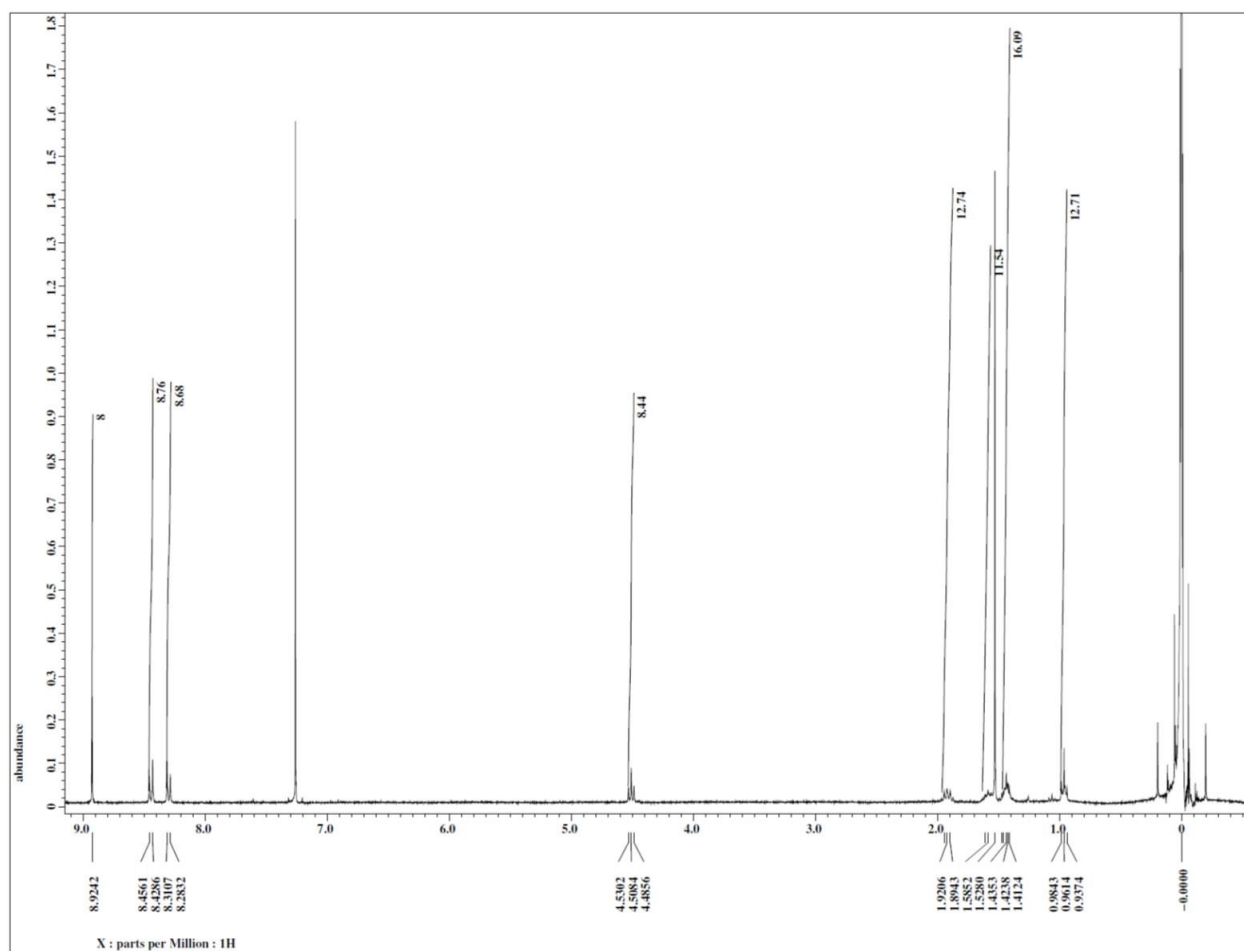

**Figure S6:** MALDI-TOF Spectra of ZnTCH<sub>4</sub>PP

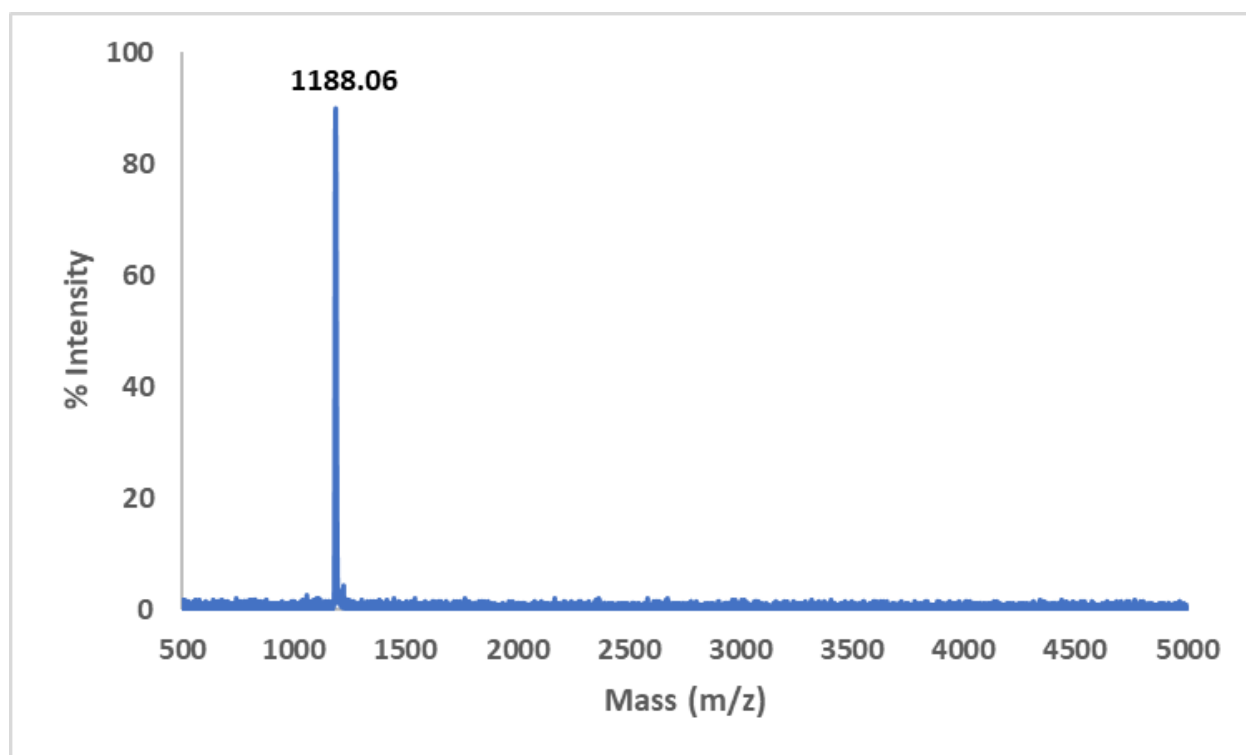

**Figure S7:**  $^1\text{H}$ -NMR of  $\text{ZnTCEH}_4\text{PP}$

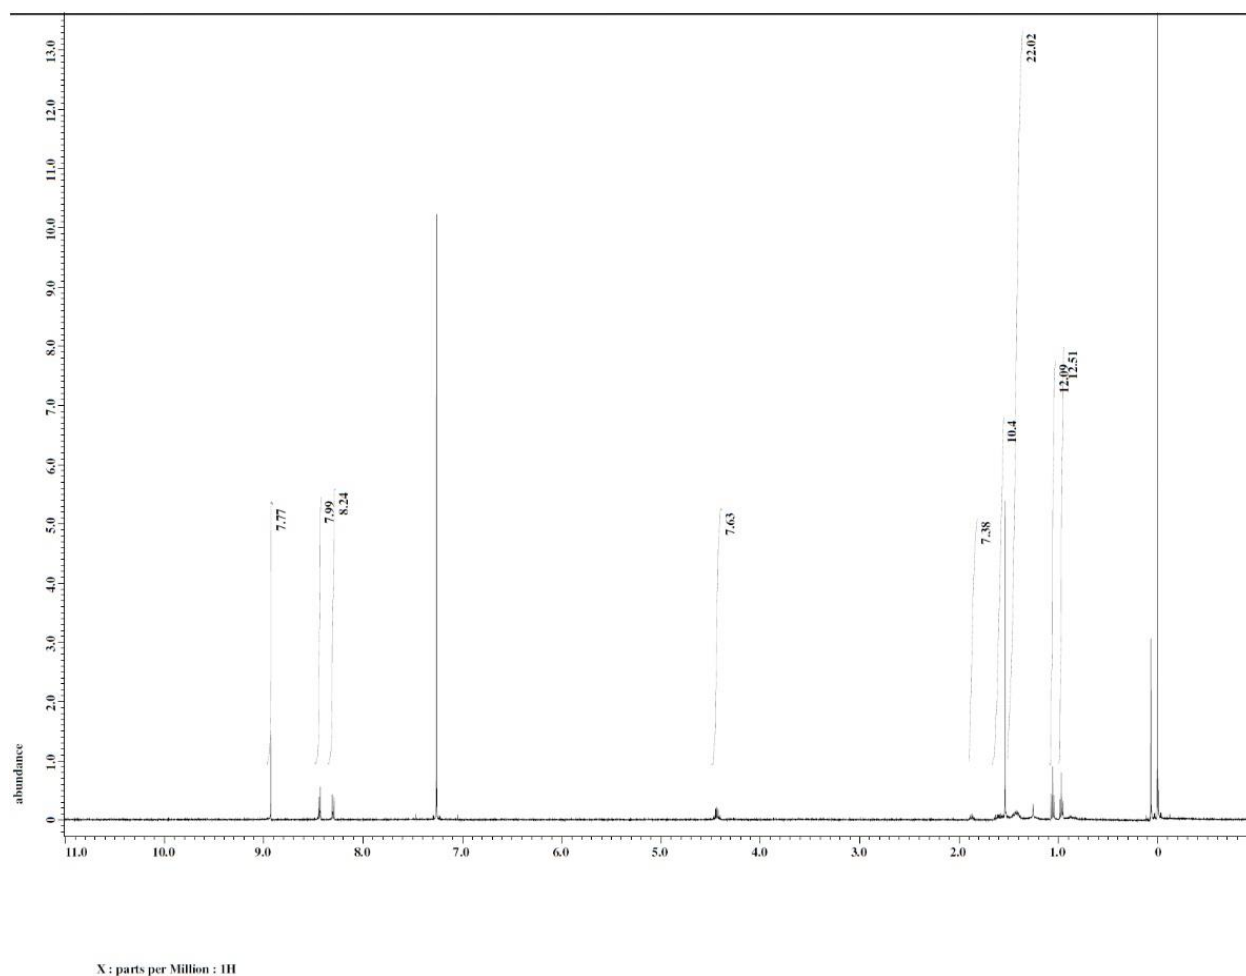



**Figure S8:** MALDI-TOF Mass Spectra of ZnTCEH<sub>4</sub>PP

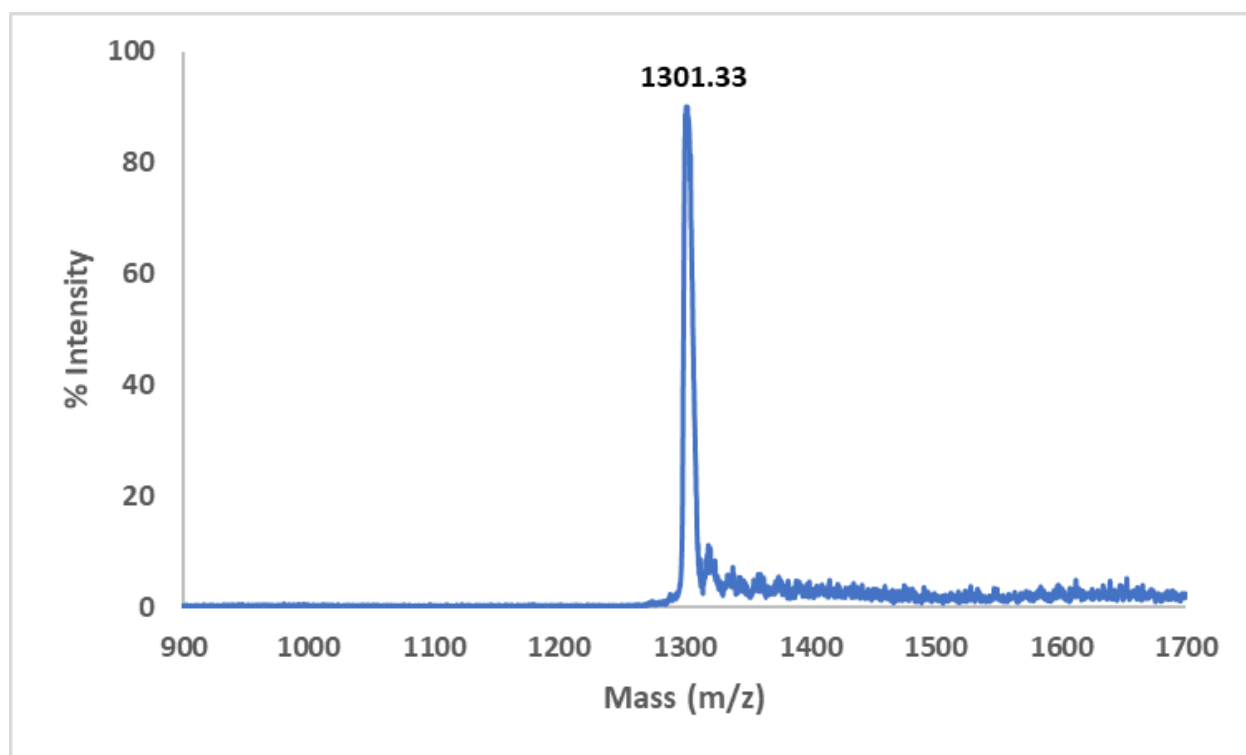

**Figure S9:**  $^1\text{H}$ -NMR of  $\text{ZnTCO}_4\text{PP}$

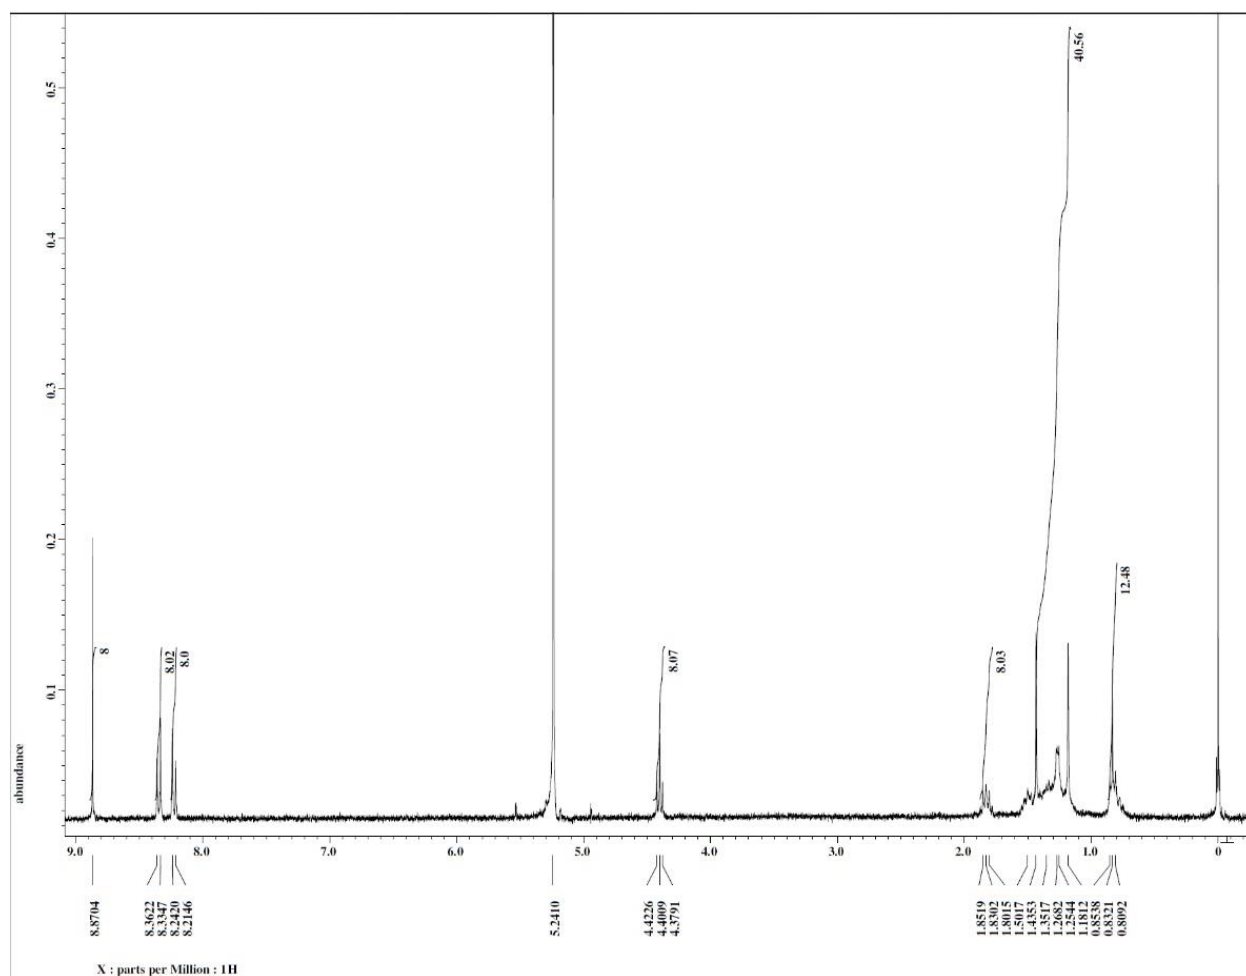

**Figure S10:** MALDI-TOF Mass Spectra of ZnTCO<sub>4</sub>PP

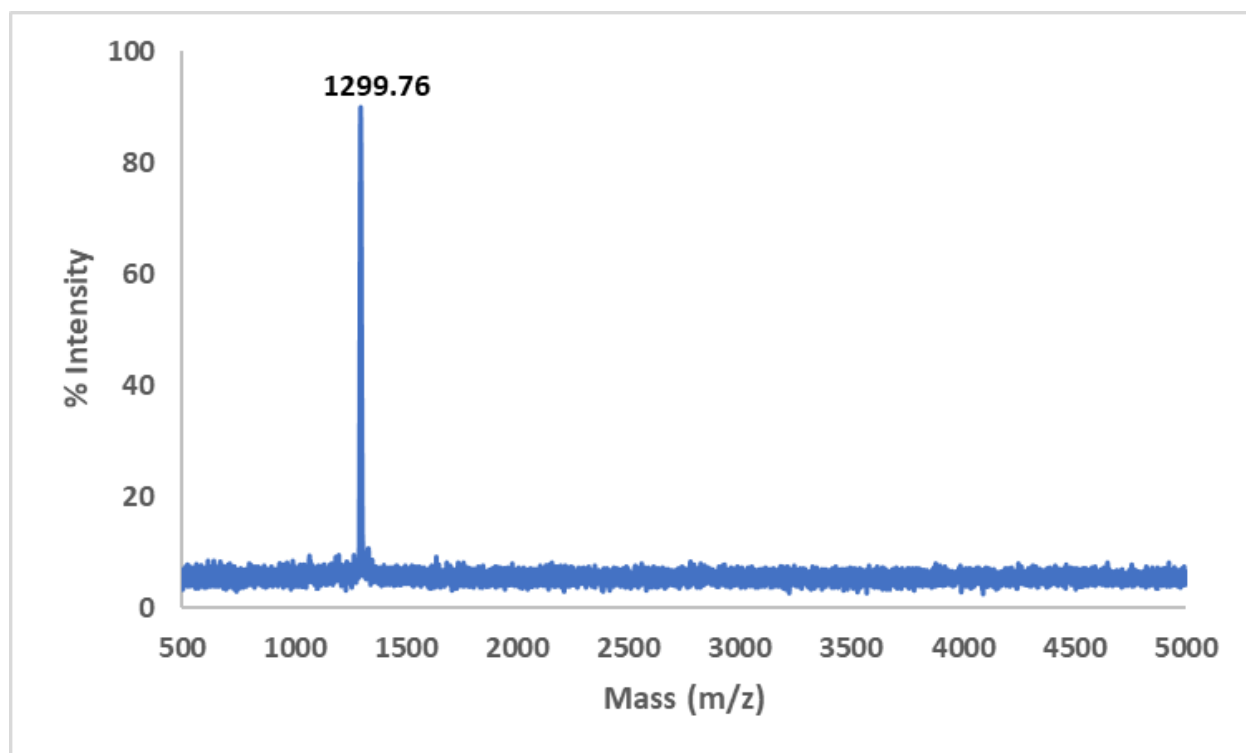

Supplement: s1 [file s1]
